# Supplementary material for: Deconvolution of boundary layer depth and aerosol constraints on cloud water path in subtropical stratocumulus decks
Source: Copernicus journal article supplement (doi:10.5194/acp-20-3609-2020), 2020-03-26
Supplement: Supplementary file 1 [file acp-20-3609-2020-supplement.pdf]

Supplement of Atmos. Chem. Phys., 20, 3609–3621, 2020  
<https://doi.org/10.5194/acp-20-3609-2020-supplement>  
© Author(s) 2020. This work is distributed under  
the Creative Commons Attribution 4.0 License.

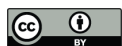

*Supplement of*

## **Deconvolution of boundary layer depth and aerosol constraints on cloud water path in subtropical stratocumulus decks**

**Anna Possner et al.**

*Correspondence to:* Anna Possner (apossner@iau.uni-frankfurt.de)

The copyright of individual parts of the supplement might differ from the CC BY 4.0 License.

## Figures

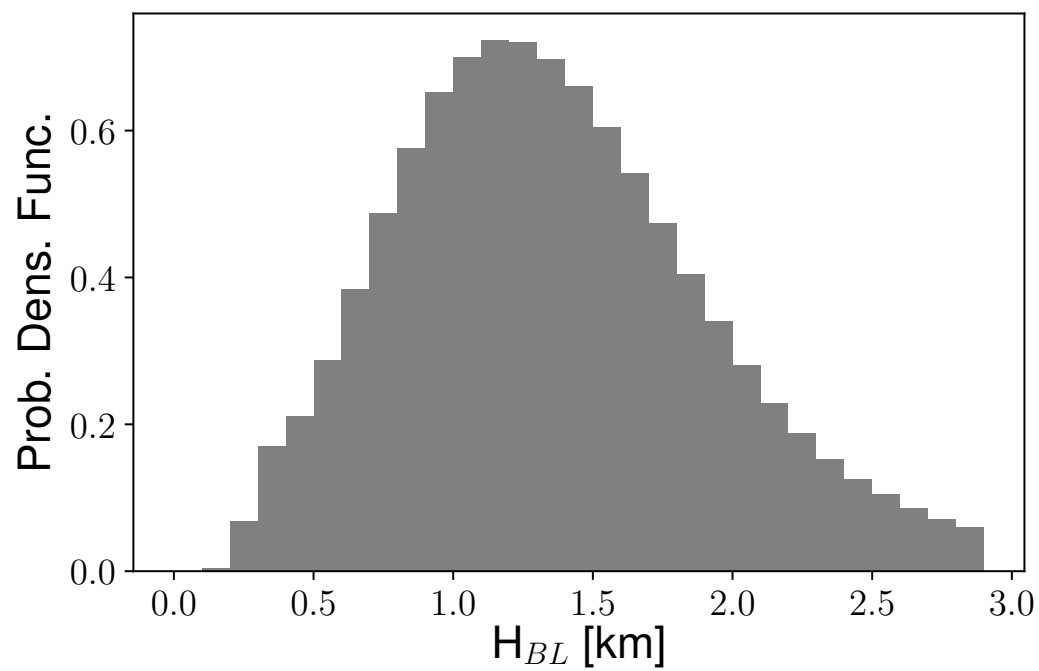

**Figure S1.** Probability density function of Boundary Layer Height ( $H_{BL}$  in Subtropical stratocumulus regions shown in Fig. 2 in main manuscript.

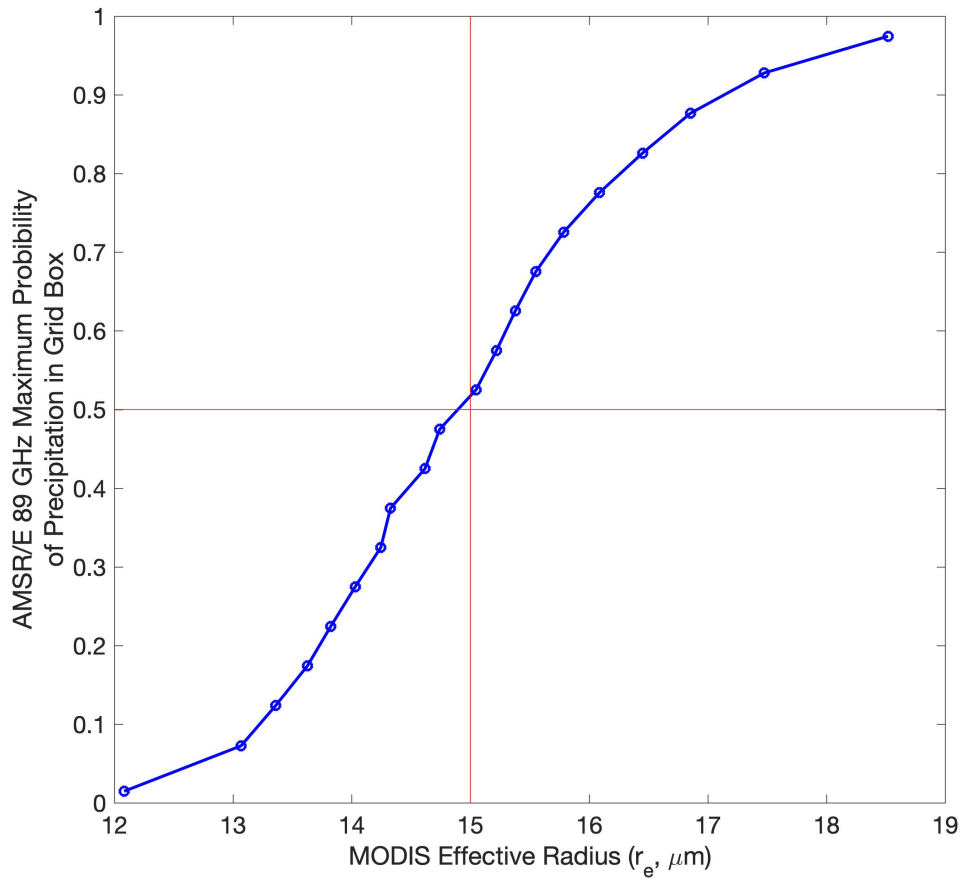

**Figure S2.** Effective radius ( $R_{eff}$ ) plotted against precipitation probability at cloud base for all sub-tropical marine stratocumuli. The precipitation probabilities at cloud base were obtained from the Advanced Microwave Scanning Radiometer for (AMSR/E) 89 GHz brightness temperature, for which a retrieval algorithm has been developed based on light rain CloudSat retrievals in collocating regions (*Eastman et al. [2019]*). Only data for the year 2007 are included here for which the precipitation probability retrieval is available.

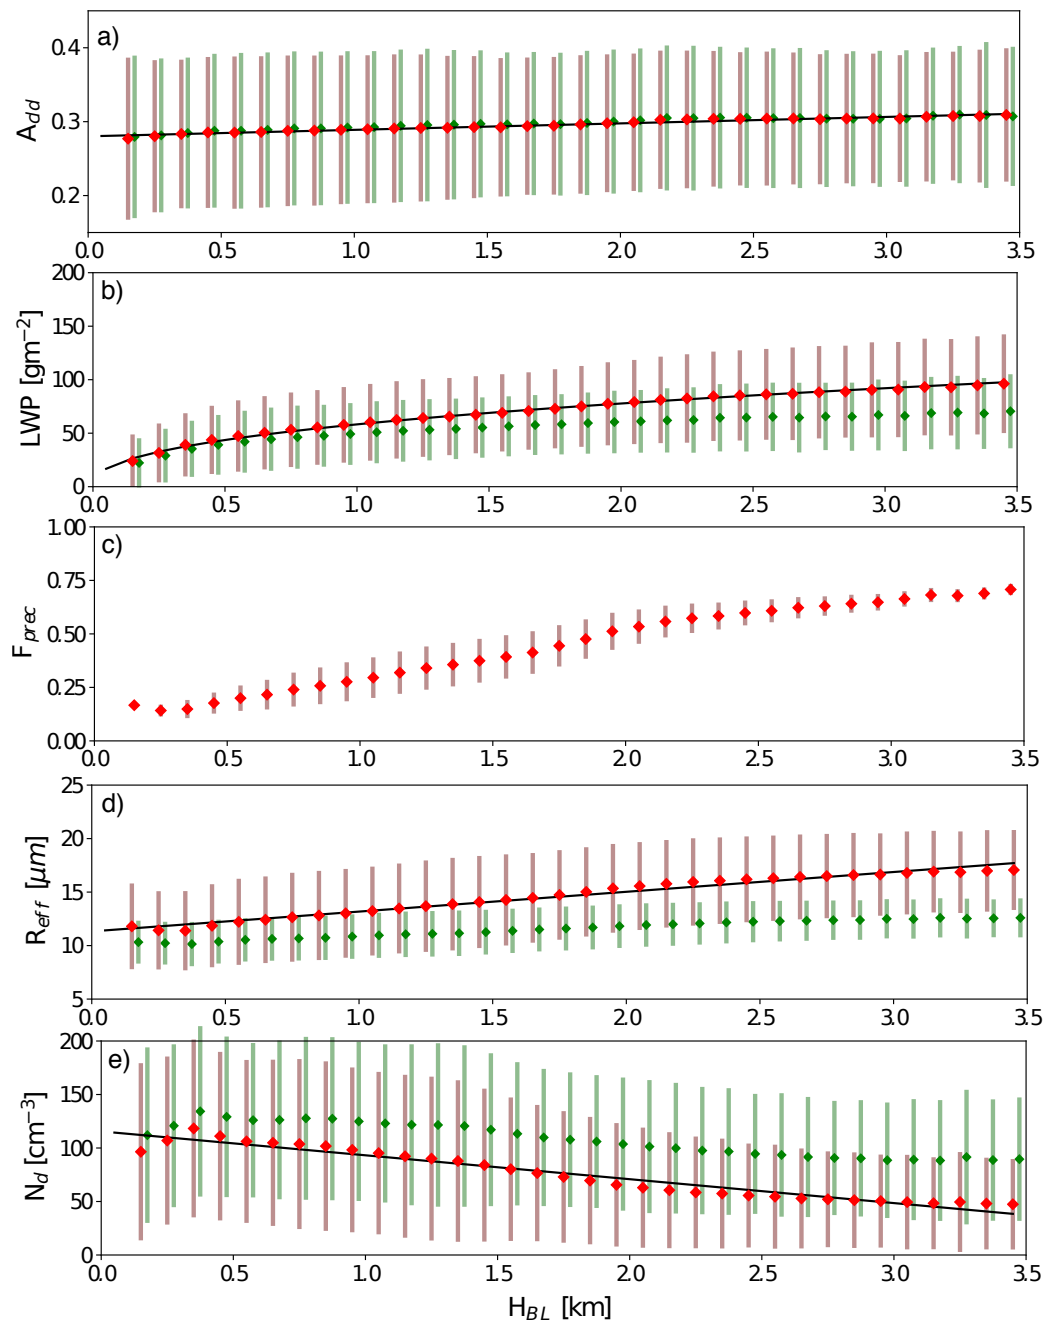

**Figure S3.** Same as Fig. 3 of manuscript. Scaling relations are shown for all clouds (red) with superimposed fitting lines (black) and non-precipitating clouds (green).

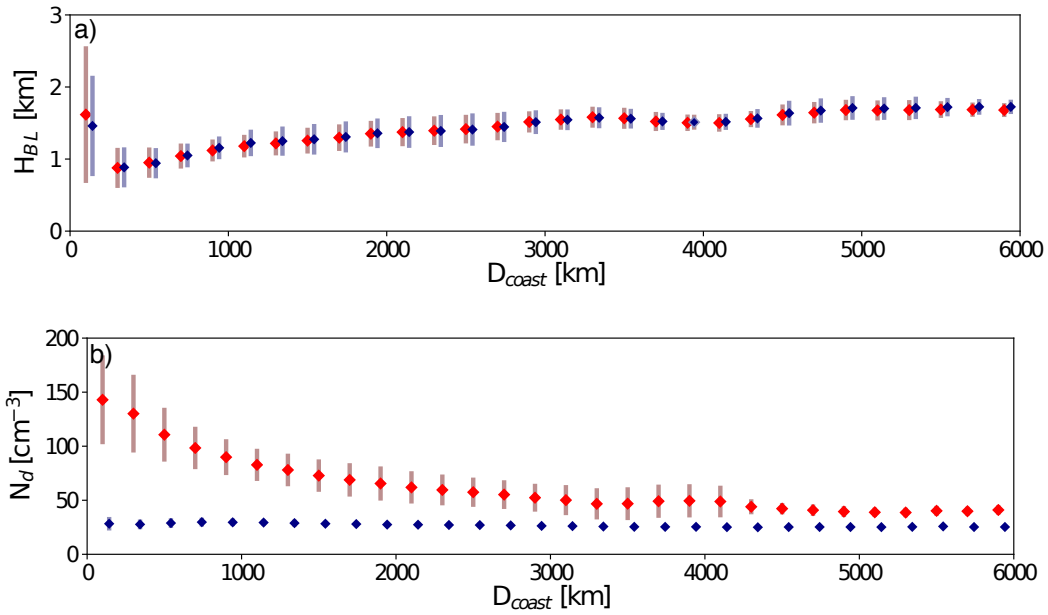

**Figure S4.** (a) Increase in boundary layer depth ( $H_{PBL}$ ), and (b) decrease in cloud droplet number concentration ( $N_d$ ) with increasing distance to the nearest continent. The distance to the nearest shore line is approximated by the distance to the nearest land point at a given latitude ( $D_{coast}$ ). The mean and standard deviation are computed within each 200 km-wide bin based on the  $H_{PBL}$  and  $N_d$  climatologies within the Southeast Pacific, Northeast Pacific, and Southeast Atlantic stratocumulus regions depicted in Fig. 2. The relationship for all clouds is shown in red and for precipitating clouds in blue.

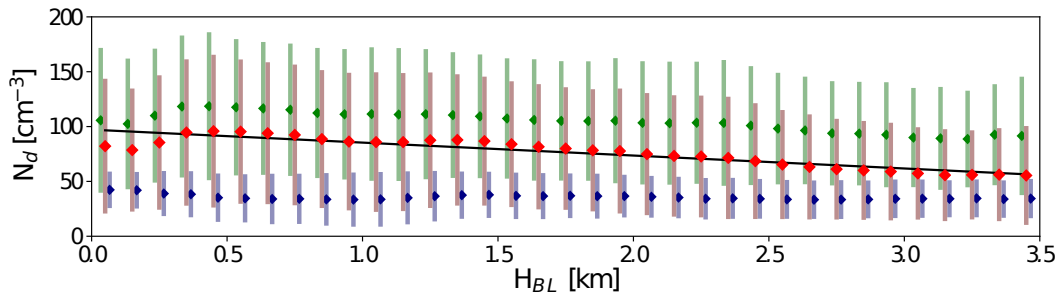

**Figure S5.** De-seasonalised and de-regionlised  $N_d$  climatology against  $H_{BL}$ . Markers denote climatological mean and bars denote the standard deviation for all clouds (red), precipitating clouds (blue) or non-precipitating clouds (green).

| Quantity                      | stability |            | above cloud RH |         | cloud-base precipitation |         |           | all       |
|-------------------------------|-----------|------------|----------------|---------|--------------------------|---------|-----------|-----------|
|                               | stable    | non-stable | dry            | moist   | no-rain                  | rain    |           |           |
| sample size                   | 1 753 467 | 276 745    | 1 688 442      | 341 770 | 1 313 803                | 715 109 |           | 2 030 212 |
| $\sigma_{\ln LWP}$            | 0.01      | 0.02       | 0.01           | 0.02    | 0.01                     | 0.02    |           | 0.006     |
| $\overline{\sigma_{Ref}}$     | 0.005     | 0.007      | 0.05           | 0.002   | 0.002                    | x       |           | 0.004     |
| $\overline{\sigma_{N_d}}$     | 0.01      | x          | 0.02           | 0.009   | 0.01                     | x       |           | 0.01      |
| $\overline{\sigma_{A_{cld}}}$ | 0.001     | 0.002      | 0.002          | x       | 0.001                    | 0.002   |           | 0.001     |
|                               |           |            |                |         |                          | fully   | partially |           |
| sample size                   | 1 699 750 | 225 363    | 1 662 972      | 290 586 | 948 579                  | 279 278 | 727 614   | 1 958 215 |
| $\sigma_{lwp}$ (bivariate)    | 0.001     | 0.002      | 0.001          | 0.06    | 0.002                    | 0.004   | 0.002     | 0.001     |
| $\sigma_{lwp}$ ( $N_d$ -only) | 0.004     | 0.006      | 0.006          | 0.006   | 0.01                     | 0.04    | 0.006     | 0.004     |

**Table S1.** This table provides the statistical error (denoted here as  $\sigma$ ) of the slopes determined by ordinary least squares regression in Table 1 of the manuscript. The sample size of each regime is included for the first part of this table characterising the PBL depth dependence and the second part separately.
